1           **A quantitative tri-fluorescent yeast two-hybrid system:**  
2                           **from flow cytometry to *in-cellula* affinities**

3  
4   David Cluet, Ikram Amri, Blandine Vergier, Jérémie Léault, Clémence Grosjean, Dylan Calabresi,  
5   and Martin Spichy<sup>#</sup>

6  
7   Laboratoire de Biologie et de Modélisation de la Cellule, Ecole Normale Supérieure de Lyon,  
8   CNRS, Université Lyon 1, Université de Lyon; 46 allée d'Italie; 69364 Lyon cedex 07; France.

9  
10   <sup>#</sup>) corresponding author. Phone: +33 472 72 8645; Email: martin.spichy@ens-lyon.fr.

11  
12  
13   Running title: **A quantitative tri-fluorescent yeast two-hybrid system**

## A quantitative tri-fluorescent yeast two-hybrid system

14

### 15 **Keywords**

16 Yeast 2 Hybrid, Protein-Protein interactions, Fluorescence, Computational Biology, Cell sorting,

17 Affinity, Flow cytometry

18

### 19 **Abbreviations**

20 PPIs, Protein-Protein interactions; qY2H, quantitative yeast two-hybrid; BD-Bait, DNA Binding

21 Domain fused to the Bait; AD-Prey, Activation Domain fused to the Prey

22

23 **Abstract**

24 We present a technological advancement for the estimation of the affinities of Protein-  
25 Protein Interactions (PPIs) in living cells. A novel set of vectors is introduced that enables a  
26 quantitative yeast two-hybrid system based on fluorescent fusion proteins. The vectors allow  
27 simultaneous quantification of the reaction partners (Bait and Prey) and the reporter at the single-  
28 cell level by flow cytometry. We validate the applicability of this system on PPIs with different  
29 affinities. After only two hours of reaction, expression of the reporter can easily be detected even  
30 for the weakest PPI. Through a simple gating analysis, it is possible to select only cells with  
31 identical expression levels of the reaction partners. As a result of this standardization of expression  
32 levels, the mean reporter levels directly reflects the affinities of the studied PPIs. With a set of PPIs  
33 with known affinities, it is straightforward to construct an affinity ladder that permits rapid  
34 classification of PPIs with thus far unknown affinities. Conventional software can be used for this  
35 analysis. To permit automated high-throughput analysis, we provide a graphical user interface for  
36 the Python-based FlowCytometryTools package.

37

38

## 39 **Introduction**

40 Protein-protein interactions (PPIs) are essential for many functions in living cells, including  
41 communication of signals, modulation of enzyme activity, active transportation, or stabilization of  
42 the cell structure by the cytoskeleton (1–4). Resolving the complex cellular network of PPIs  
43 remains one of the major challenges in proteomics (5). Thus, the quest for reliable methods that  
44 identify PPIs and quantify their strength is unbroken.

45 The yeast two-hybrid technique (Y2H) is a commonly used approach to probe the  
46 interaction between proteins (6–8). In contrast to biochemical *in-vitro* methods (such as mass  
47 spectrometry, ITC or SPR) that require purified proteins, Y2H is based on a genetic assay. It relies  
48 on the *in-cellula* expression of fusions of the two proteins of interest, usually named Bait and Prey.  
49 Upon physical interaction of Bait and Prey, a functional transcription factor is reconstituted that  
50 drives the expression of a reporter gene (*e.g.*,  $\beta$ -galactosidase). As a consequence, a read-out is  
51 observed (*e.g.*, color, fluorescence, or growth) that permits high-throughput screens.

52 Y2H has been extensively used in the past decades to decipher PPI networks (9, 10). With  
53 growing experience, the scientific community became aware of the limitations of this approach.  
54 Standard Y2H is prone to false positive/negative results (8). For example, the absence of a  
55 detectable read-out may reflect insufficient expression of the Bait and/or Prey. More laborious  
56 Western blottings can be performed to verify the expression (11). Furthermore, Y2H provides often  
57 only a qualitative result. With X-gal-based Y2H (12), for instance, the measured read-out (color)  
58 cannot be assumed to be proportional to the reporter level, *i.e.*,  $\beta$ -galactosidase activity, but  
59 exceptions exist (13, 14). Also, the extent of  $\beta$ -galactosidase activity does not necessarily reflect

60 the extent of interaction between Bait and Prey (due to varying expression levels of Bait and Prey  
61 fusions).

62 Several groups tried to overcome the qualitative limitations of the two-hybrid system in  
63 yeast and other organisms. Extensive overviews can be found in the literature, for example Ref.  
64 (8). Many applied methods could rank PPIs according to their affinity using the quantified read-  
65 out, examples are included in Refs. (13–17). It should be noted, however, that mainly mutants were  
66 compared. Similar expression levels for the Bait and Prey fusions can be assumed for such  
67 mutational studies. Comparing proteins from different families often breaks the correlation (11). It  
68 speaks to the need of quantifying not only the read-out but the Bait/Prey fusions as well. Thus far,  
69 only low-throughput methods exist that address this necessity. For example, by measuring the  
70 fraction of co-localized fluorescent “Bait” and “Prey” fusions in human cells by high-resolution  
71 microscopy (18) it was possible to optimize the affinity of an inhibitor (19). Another approach used  
72 a fluorescent antibody to quantify the amount of retained Prey by the Bait associated to the  
73 periplasm (20). Following this idea, different yeast surface two-hybrid approaches emerged (17,  
74 21) using antibodies or purified proteins.

75 Here we present a novel set of Y2H vectors that enable the quantification of the reaction  
76 partners (Bait, Prey) and the reporter at the single-cell level without the need of any antibodies or  
77 purified proteins (Fig. 1). Three different fluorescent tags serve as sensors to probe the cellular  
78 expression levels by flow cytometry. The vectors have been validated on protein-protein  
79 interactions with varying affinities (see Table 1) to encompass the sensitivity of the novel  
80 quantitative Y2H (qY2H) system.

81

## 82 **Experimental Procedures**

### 83 *Experimental design*

84 Starting from the original plasmids pLexA and pB42AD (22), several new cloning sites  
85 were introduced that permit convenient sub-cloning into the expression cassettes via homologous  
86 recombination in yeast (see Suppl. Fig. S1 for detailed vector maps). Thus, the newly designed  
87 vectors facilitate the construction of novel fusions proteins with tailored functionalities. Here we  
88 generated cassettes that code for BD-Bait, AD-Prey and reporter fusions with several new features  
89 as shown in Fig. 1. We copied the HA tag (that was originally only in the AD-Prey expression  
90 cassette) to the BD-Bait cassette to enable the simultaneous quantification of expressed BD-Bait  
91 and AD-Prey fusions by Western Blotting. In addition, we added red and green fluorescent tags  
92 (Tag RFP and yEGFP) to the BD-Bait and AD-Prey cassettes, respectively. Furthermore, the  
93 original reporter ( $\beta$ -galactosidase) was replaced by a tandem of the Tag BFP in the pSH18-34  
94 vector (22). The three fluorescent tags emit at considerably different wavelength ranges so that  
95 their individual expression levels can be simultaneously monitored at the single-cell level by flow  
96 cytometry (Fig. 1B). Also, a spacer sequence was added between the fluorescent tags and the  
97 Prey/Bait to avoid steric hindrance in the expressed fusions.

98 The new constructs were tested on two well-studied protein-protein interactions (23–29):  
99 the association between the bacterial ribonuclease Barnase and its inhibitor Barstar, as well as  
100 between the human GTPase HRas and the Ras-binding domain of CRaf. Different mutants were  
101 applied (Table 1) that span a wide range of affinities (known from independent *in-vitro*  
102 experiments). By exchanging Bait and Prey for a given couple it is possible to probe the  
103 corresponding PPI in two different orientations. We cross-tested all proteins of Table 1 as BD-Bait  
104 and AD-Prey fusions with proper negative controls, *i.e.*, empty AD-EGFP and BD-RFP fusions,

105 respectively, to eliminate orientations that lead to false positive interactions (see Material &  
106 Methods).

107 For a given couple, the two orientations may also lead to different read-outs (15). Table 1  
108 lists the couples in the orientation with the stronger reporter level (when the cellular contents of  
109 BD-Bait and AD-Prey are standardized, see below). This orientation is considered as the molecular  
110 configuration with the higher accessibility of the PPI binding interface (15). Or in other words, this  
111 orientation may feature the smaller steric hindrance due to the fused fluorescent BD and AD and  
112 probably resembles more closely the situation of free (not fused) proteins. We focus therefore in  
113 the following sections on the orientation given in Table 1.

114 Haploid cells were transformed with either Prey or Bait plasmids; in the latter case we used  
115 haploid cells that were previously transformed with the reporter plasmid. Transformed yeast cells  
116 were mated and amplified to generate diploid colonies for the desired Bait/Prey-couples. Selection  
117 and amplification of the diploids occurred in glucose medium which represses the expression of  
118 the AD-Prey fusion (under the control of the GAL1 promoter). Transfer of the diploid cells into  
119 Galactose/Raffinose medium induced the expression of the AD-Prey fusion and enabled the  
120 expression of the reporter.

121 After fixation, the samples were submitted to flow cytometry measurements to monitor the  
122 fluorescence intensities at the single cell level for three different channels matching the emission  
123 ranges of the fluorescent BD-Bait, AD-Prey and reporter fusions; hereafter these channels are  
124 named Tag-RFP-H, yEGFP-H and Tag-BFP-H, respectively.

125 We analyzed the expression level of the fluorescent proteins either for the entire cell  
126 population (to which refer as “global” hereafter) or for subpopulations using interval gatings. The  
127 entire procedure starting from the transformation up to the flow cytometry measurement was  
128 repeated at least three times for each protein-protein interaction.

129

130 *Plasmid creation*

131 In order to generate the pSB\_1Bait plasmid, the pLexA (22) vector was linearized using  
132 *EcoRI* and *Sall* (Thermo Scientific) to remove all DNA between the LexA cDNA and the ADH  
133 terminator. The Barstar WT coding sequence was ordered for synthesis to Eurofin Genomics as  
134 part of a new expression cassette. At the 5' end we added the sequences of the HA-Tag and our  
135 MCS-spacer (*EcoRI*, *AscI*, and *XhoI*). At the 3' end, after the stop codon of Barstar, we inserted  
136 one *XhoI* site, created 3 stop codons (1 per ORF) and regenerated the *Sall* site. The upstream  
137 (LexA) and downstream (Terminator) 30bp required for homologous recombination in yeasts (30,  
138 31) were also added. This new optimized expression cassette was amplified by PCR (Phusion DNA  
139 polymerase, Thermo Scientific), using the primers primSB\_0001 and 2 (see Suppl. Table S1), and  
140 inserted in the previously linearized pLexA vector. As a result, we obtained the pSB\_1Bait\_Barstar.  
141 The coding sequence for Tag-RFP was subsequently introduced in the *EcoRI* site through PCR  
142 from pTag\_RFP-Actin (Evrogen), using the primers primSB\_0003 and 0004, combined with  
143 homologous recombination in yeasts to obtain the pSB\_1Bait\_RFP-Barstar plasmid. The  
144 pSB\_1Bait\_RFP-Empty and pSB\_1Bait-Empty vectors were generated by digesting the  
145 pSB\_1Bait\_RFP-Barstar and pSB\_1Bait\_Barstar, respectively, with *XhoI* (Thermo Scientific),  
146 followed by self-ligation. The coding sequences of the mutants of Barstar, and Ras\_G12V\_C186A  
147 were ordered to Eurofin Genomics, amplified (primSB\_0018 and 0019) and introduced in the  
148 pSB\_1Bait\_RFP-Empty linearized with *XhoI* by homologous recombination.

149 To create the pSB\_1Prey vector, the pB42AD plasmid (22) was linearized using *EcoRI* and  
150 *XhoI*. The sequence coding for the non-toxic Barnase mutant H102A was ordered from Operon  
151 MWG. At the 5' end we inserted the same MCS-spacer sequence as in the pSB\_1Bait vector to  
152 allow easy transfer from one plasmid to the other. At the 3' end, we inserted one *XhoI* site, created



153 3 stop codons and one *NcoI* restriction site. The upstream (HA-Tag) and downstream (Terminator)  
154 30bp required for homologous recombination in yeasts were also introduced. This new expression  
155 cassette was then amplified by PCR (primSB\_0010 and 0011) and inserted in the pB42AD by  
156 homologous recombination in yeast to obtain the pSB\_1Prey\_Barnase-H102A vector. The coding  
157 sequence of the yEGFP was amplified from the pGY-LexA-GFP\_KanMX (kindly provided by Dr  
158 Gaël Yvert) using the primers primSB\_0012 and 0013, and then introduced in the *EcoRI* site of our  
159 MCS as previously to generate the pSB\_1Prey\_yEGFP-Barnase-H102A vector. The pSB\_1Prey-  
160 Empty and pB\_1Prey\_yEGFP-Empty were created by removing the coding sequence of Barnase  
161 H102A with *XhoI* and performing a self-ligation. The coding sequences of the other Preys (CRaf  
162 RBD WT, and CRaf RBD A85K) were ordered to Eurofin Genomics, amplified by PCR  
163 (primSB\_0020 and 21) and introduced in the pSB\_1Prey\_yEGFP-Empty linearized with *XhoI* by  
164 homologous recombination.

165 To create the reporter plasmid, the pSH18-34 (22) was digested using the unique *SallI* (In  
166 the modified Gal1 promoter) and *RsrII* (downstream to the  $\beta$ -Galactosidase coding sequence)  
167 restriction sites. We subsequently reconstructed the expression cassette using four PCR products:

168 1) The Gal1 promoter delta Gal4 with 8 operator LexA and the Kozack sequence with  
169 a new downstream MCS (*AscI*, *NheI*) (primSB\_0076 and 0077).

170 2) The Gal1 Nterm sequence (I10-C20), originally expressed by the pSH18-34, is used  
171 as spacer (primSB-0078 and 0079) between the two copies of the Tag BFP.

172 3) The coding sequence of the Tag-BFP (from pTag\_BFP-Actin, Evrogen) bordered with  
173 2 *XhoI* sites, (primSB\_0084 and 0085).

174 4) The terminator sequence (primSB\_0080 and 0081).

175           These 4 amplicons were then used to perform directly a gap repair in yeasts. Thus, we  
176 obtained the pSB\_3RO plasmid. A second copy of the Tag-BFP (primSB\_0120 and 121) was  
177 inserted in our new *NheI* site (Thermo Scientific), by homologous recombination to generate the  
178 pBFP2 plasmid. This final vector allows the expression of a dimer of Tag-BFP as reporter of the  
179 yeast two hybrid reaction.

180

#### 181 *Western blot*

182           Total protein extracts were obtained from 6 OD<sub>590nm</sub> exponentially growing diploids yeasts  
183 as previously described (32) into 60µl of sample buffer. Ten microliters were used for SDS-Page  
184 analysis on Bolt™ 4-12% Bis-Tris Plus Gels (Thermo Scientific). Electrophoresis separation was  
185 performed in NuPAGE™ MOPS SDS Running Buffer (Thermo Scientific). Proteins were then  
186 transferred on a Nitrocellulose Membrane 0.45µm (Biorad), using a Trans-Blot® Turbo™ Transfer  
187 System (Biorad) for 14 minutes, at 1A and 25V. The membrane was subsequently blocked 1 hour  
188 at room temperature in PBS + tween 0.2% (v/v) supplemented with 5% (w/v) low-fat milk powder.  
189 HA tagged proteins were labeled overnight at 4°C with the mouse HA.11 Clone 16B12 Monoclonal  
190 Antibody (Eurogentec) 1/2000 in PBS + tween 0.2% (v/v) + 10 mg/ml BSA (Albumin bovine  
191 fraction V, Euromedex). The membrane was then washed four times seven minutes in blocking  
192 buffer at room temperature. The membrane was then incubated for one hour at room temperature  
193 in presence of a sheep anti-mouse whole IgG HRP (GE Healthcare) secondary antibody diluted  
194 1/5000 in blocking buffer. The excess of antibody was removed with two washing steps of five  
195 minutes in PBS at room temperature. Labelled proteins were then revealed with Super Signal West  
196 Pico chemiluminescent substrate (Thermo Scientific) using a Biorad Chemidoc apparatus,  
197 following instructions provided by the suppliers.

198 *qY2H in liquid phase*

199 Chemo-competent EGY42 (MAT $\alpha$ ; trp1, his3, ura3, leu2) and TB50 (MAT $\alpha$ ; trp1, his3,  
200 ura3, leu2, rme1) yeasts were generated as previously described (33).

201 Competent EGY42a yeasts were transformed with 1 $\mu$ g of pBFP2 and grown on selective  
202 SD-U medium. Chemo-competent EGY42a pBFP2 yeasts were then generated and transformed  
203 with 1 $\mu$ g of Bait vectors. Haploid Bait yeast strains were then selected on SD-UH medium.  
204 Competent TB50 $\alpha$  yeasts were transformed with 1 $\mu$ g of Prey vector. Haploid Prey yeast strains  
205 were selected on SD-W medium. Matrix mating assay were performed for one night with 50 $\mu$ l of  
206 Bait and Prey strains (each) resuspended in YPAD medium at 0.1 OD at 30°C. The next morning  
207 YPAD medium was removed and the yeast diploids were harvested and amplified in 1ml of SD-  
208 UHW for 3 days at 30°C.

209 The qY2H assay was performed in pre-heated (30°C) and oxygenated SGR-UHW  
210 supplemented with Galactose 0.25% (Euromedex) and Raffinose 1% (Sigma-Aldrich) to induce  
211 the expression of the Prey proteins. To ensure we obtained an excessive number of cells (about  
212 10<sup>7</sup>) for the analysis, a culture of 100 ml was inseminated with 600  $\mu$ l of saturated diploids per  
213 couple of interest. It turned out that for a typical analysis a number of 10<sup>6</sup> cells is adequate, so that  
214 actually 10 times smaller cultures and insemination volumes can be used. The yeasts were  
215 incubated for 2h at 30°C without shaking, and then harvested after a centrifugation step of 10min  
216 at 1000g. The yeast were resuspended in 1ml PBS (Dominique Dutscher), centrifuged 1min at  
217 13000 rpm, and washed again with 1ml of PBS. The yeasts were resuspended in 500 $\mu$ l of PBS 4%  
218 PFA (Sigma-Aldrich, Catalog n°P6148) and incubated for 10min at 4°C. The fixation reaction was  
219 blocked by 2 washing steps with 1ml PBS, and one incubation of 15min at 4°C in 500 $\mu$ l of PBS  
220 0.1M Glycine (Euromedex). Finally, the yeasts were washed twice in PBS, and stored in 1ml of  
221 PBS at 4°C for not longer than 24 hours.

222

223 *Flow cytometry and data analyses*

224 The expression levels of BD-Bait, AD-Prey and reporter were acquired in linear scale using  
225 a MacsQuantVYB flow cytometer (the settings are presented in Suppl. Table S2). To ensure  
226 homogeneous sampling of the yeasts cells in suspension, we used the strong mixing mode. With  
227 the apparatus at our disposal, this mode generates at very early acquisition times a small population  
228 of particles with abnormal characteristics for yeast cells (a high red fluorescence intensity, even for  
229 non-fluorescent samples). We suspect these are micro-bubbles. To rigorously eliminate this  
230 population, we skipped the first 20 000 events of all samples files in the subsequent analysis. The  
231 flow-cytometry files were analyzed using the FlowCytometryTools package for python  
232 (<http://eyurtsev.github.io/FlowCytometryTools>). When a hlog-transformation (34) was applied,  
233 the following settings were used:  $b = 2000$ ,  $r = 10000$ , and  $d = 5.42$ .

234 Our python scripts (with a graphical user interface and user guide for the automated  
235 generation of the qY2H affinity ladder) can be downloaded here: [http://github.com/LBMC/qY2H-](http://github.com/LBMC/qY2H-Affinity-Ladder)  
236 [Affinity-Ladder](http://github.com/LBMC/qY2H-Affinity-Ladder). The flow cytometry files of the experiment shown in Fig. 4 can be downloaded  
237 from <http://flowrepository.org> under accession number FR-FCM-ZYUL.

238

## 239 **Results**

240 *qY2H enables the monitoring of the expression level of the reaction partners after 2h*

241 Two hours after induction of the Y2H reaction, the expression of all BD-Bait and AD-Prey  
242 fusions can be easily detected. Fig. 2A displays their fluorescence intensities for a subset of  
243 couples. The fluorescence intensity typically spans several orders of magnitude higher than the  
244 negative controls. However, expression problems can be seen for BD-HRas (Fig. 2C). Independent  
245 quantification by Western Blotting (Fig. 3) shows that the expression level of BD-HRas is indeed

246 impaired. In fact, BD-HRas cannot be detected in the Western blot. Flow cytometry, on the other  
247 hand, indicates a slight shift in the probability distribution for BD-HRas expressing cells (with  
248 respect to the negative control, see also Fig. 4A).

249 Thus, flow cytometry gives an immediate indication on eventual expression problems of  
250 the Bait and Prey fusions during acquisition. This contrasts with standard Y2H experiments where  
251 the expression level of the BD-Bait and AD-Prey fusions is usually unknown at the time of reporter  
252 detection. More laborious Western Blots are usually required to gain this information.

253

254 *Reporter level is correlated with the expression level of the reaction partners*

255 Even for the weakest Bait-Prey interaction the reporter can already be detected two hours  
256 after induction (Fig. 2); it is clearly above the level of the negative control (panel B). Moreover,  
257 we observe that the reporter level (*i.e.*, blue fluorescence intensity) is correlated with the green and  
258 red fluorescence intensity: more reaction partners (*i.e.*, higher amount of interacting BD-Bait and  
259 AD-Prey fusions) yielded more product (reporter). This obvious correlation has consequences for  
260 the extraction of quantitative information on the strength of PPIs as we demonstrate later on. In the  
261 case of the Bait/Prey-couple BD-B112/AD-Barnase H102A (Fig. 2F) this correlation is basically  
262 only observed for the red fluorescence (BD-Bait). The B112 acid blob acts as an activation domain  
263 (35, 36) so that this specific BD-Bait fusion is a functional transcription factor by itself that does  
264 not depend on the AD-Prey fusion.

265

266 *Standardization of BD-Bait and AD-Prey levels is required to gain information on binding strength*

267 In all repetitions of the experiment, the reporter level of the global cell population roughly  
268 reflects the magnitude of the (*in-vitro*) affinity. As shown in Fig. 4A for a single experiment and a  
269 small subset of PPIs, the Bait-Prey couples with high affinity ( $K_d \sim \text{pM}$ ) could be easily

270 distinguished from medium-affinity couples ( $K_d \sim \text{nM}$ ) based on their mean reporter level. It  
271 confirms results of previous studies that the global Y2H read-out correlates with *in-vitro* affinity  
272 (13–17). In addition, our approach discloses the influence of the expression levels of the reaction  
273 partners, *i.e.*, the BD-Bait and AD-Prey fusions. Their levels may vary significantly between the  
274 studied couples (Fig. 2 & 3) and to a smaller extent between different experiments. These variations  
275 complicate the discrimination of Bait-Prey couples based on their affinities. Fig. 4A presents a  
276 particularly illustrative experiment: The couple BD-HRas / AD-CRaf displays a 20 times lower *in-*  
277 *vitro*  $K_d$ -value than the couple BD-Barstar D39A / AD-Barnase H102A. Yet the mean reporter level  
278 (Fig. 4A, right column) is lower for the former couple than for the latter couple; the opposite would  
279 have been expected according to the *in-vitro* affinities. We note, however, that the former couple  
280 exhibits a significant lower expression level of the BD-Bait fusion (Fig. 4A, left column) than the  
281 latter. Thus, can quantitative information on the strength of the interaction (*i.e.*, relative affinities)  
282 be reliably extracted from such an experiment?

283 To address this question, we tried to correct for differences in the expression level by sub-  
284 selecting (gating) only cells that display a red and green fluorescence intensity within a certain  
285 narrow interval (see Fig. 4B & C). And indeed, when standardizing the red fluorescence intensity  
286 (*i.e.*, gating for cells with similar BD-Bait expression level), the mean reporter level reflects the *in-*  
287 *vitro* affinities for the two couples BD-HRas / AD-CRaf and BD-Barstar D39A / AD-Barnase  
288 H102A (Fig. 4B). Similarly, the couple BD-Barstar Y29F / AD-Barnase H102A has the lowest  
289 AD-Prey expression level and displays a weaker reporter level than expected. Standardization of  
290 the AD-Prey level corrects the reporter levels of the studied couples according to their reported *in-*  
291 *vitro* affinities (Fig. 4C). Changing the location of the gating intervals leads to the same conclusions  
292 (see Suppl. Fig. S2). Nevertheless, suggestions can be made to choose the optimal the gating  
293 intervals (see “Recommendations”).

294  
295 *Affinity ladder permits rapid classification of PPIs based on their strength*  
296 Often the goal is to rank PPIs based on their affinity or to obtain an upper and lower bound  
297 for the dissociation constant. With the above gating approach, an affinity ladder can easily be  
298 generated with a set of PPIs with known dissociation constants (Fig. 5). Standard software of flow  
299 cytometers can be used to perform the required gatings and calculate mean fluorescence intensities.  
300 We provide a graphical user interface to automate the generation of the affinity ladder (see  
301 Experimental Procedures).

302 The generated affinity ladder can then be used for a rapid visual classification of PPIs with  
303 thus far unknown affinities within a given range (here from nano- to picomolar). This is  
304 demonstrated at the example of the mutation D35A of Barstar. Thus far, no *in-vitro* affinity data is  
305 available for the interaction of this mutant with Barnase H102A. With the affinity ladder of Fig. 5  
306 we can rank the affinity between those of HRas/CRaf 122 nM) and HRas/CRafA85K (11 nM).

307 Our experiment indicates that the Barstar mutant D35A exhibits a significantly higher  
308 affinity for Barnase H102A than the Barstar mutant D39A (420 nM). To validate this observation,  
309 we performed independent alchemical free-energy calculations (see Supp. Mat.). Through the use  
310 of a thermodynamic cycle (Suppl. Fig. S3A) we calculated the difference in binding free energy  
311 between the mutants Barstar D35A and Barstar D39A. We obtained a value of  $-1.9 \pm 0.3$  kcal/mol  
312 which indicates that the dissociation constant of the mutant D35A is about 20 times lower than that  
313 of the mutant D39A. Thus, we can estimate a dissociation constant of about 20 nM for the mutant  
314 D35A in agreement with the qY2H experiment.

315

316 **Discussion**

317 *Quantitative features of the tri-fluorescent yeast two-hybrid system*

318 The tri-fluorescent qY2H system offers the novelty of identifying expression correlations  
319 for the genes involved in the actual Y2H reaction. For true positive interactions the read-out is  
320 correlated with both reaction partners. For false positive interactions where the Bait acts as an AD  
321 (*e.g.*, B112), the read-out is basically only correlated with one reaction partner. This characteristic  
322 correlation patterns can serve as additional criteria to discriminate such false positive interactions  
323 from true positives. It complements the use of proper controls (*i.e.*, empty Bait and Prey plasmids)  
324 routinely applied in Y2H assays.

325 In the past, significant effort has been spent to render the Y2H read-out quantitative and  
326 thereby gain quantitative information on the strength of interactions (see cited literature in the  
327 Introduction). Our study clearly demonstrates that the quantification of the reaction partners is  
328 important, too. We have shown that variations in the expression levels of BD-Bait and AD-Prey  
329 can lead to reporter levels that are not ordered according to the underlying PPI affinities. Through  
330 a simple gating process, it is, however, possible to standardize the expression levels of BD-Bait  
331 and AD-Prey and thereby overcome this difficulty.

332

333 *In-cellula is not in-vitro*

334 The observed agreement between *in-cellula* reporter levels and *in-vitro* affinities (Fig. 4B)  
335 cannot be presumed *a priori*. The *in-vitro* experiment measures the affinity between the interactors  
336 alone (or with tags) whereas the qY2H system relies on fusions proteins (Fig. 1). If the fused  
337 domains influence the interaction between the Bait and Prey, *e.g.*, by blocking the binding  
338 interface, the resulting *in-cellula* reporter level would be impaired and most likely not correlate  
339 with the *in-vitro* affinity.



340 *In-vitro* experiments measure the affinity under well-defined buffer-controlled equilibrium  
341 conditions. In contrast, our *in-cellula* experiments take place in non-equilibrium microvessels (37)  
342 where the interaction partners can interact with the endogenous complex solution of biomolecules.  
343 This may lead to effectively smaller concentrations of the reaction partners. Also, post-translational  
344 modification(s) could impact the interactions.

345 With prior knowledge about the Bait or Prey the amino-acid sequence can be optimized to  
346 take into account some effects, like specific sub-cellular localization. An illustrative example is the  
347 protein HRas, which is usually found to be associated to the cytoplasmic membrane through its C-  
348 terminal anchor. Mutation of C186A abolishes the anchor function (38) and the protein can be used  
349 for the *in-cellula* titrations.

350

### 351 *Recommendations*

352 Beside potential sequence optimizations (as proposed above), we recommend the following  
353 precautions to be taken for the measurement with the qY2H system:

- 354 1) As in any Y2H screen, BD-Bait and AD-Prey constructs should be tested against negative  
355 controls, *i.e.*, an empty AD and BD construct, respectively, to identify potential false positive  
356 interactions. Also, a mating of yeasts expressing only empty (but fluorescent) AD and BD  
357 constructs is recommended; it serves to remove the background of the system.
- 358 2) The PPIs should be tested in both orientations, *i.e.*, with the proteins switched between the  
359 Bait and Prey vectors, to identify the orientation with the lower background and with the  
360 higher reporter level (for standardized levels of reaction partners).
- 361 3) We recommend to pre-transform BD-Bait-expressing haploids with the read-out plasmid; it  
362 increases the read-out; two subsequent transfections are more efficient than a single double  
363 transfection. Use only freshly transformed yeast cells for the qY2H experiment. Storing

364 diploids yeast cells for a week in the refrigerator decreases the level of AD-Prey and read-  
365 out by a factor two to five.

366 4) For the construction of the affinity ladder, the gating interval for the red fluorescence  
367 intensity (BD-Bait) was positioned at the lowest possible location to avoid saturation effects,  
368 *i.e.*, it was set just above the 95-% threshold of the negative control. The gating intervals of  
369 the green fluorescence intensity was set to a medium range value to reach the desired  
370 sensitivity but to avoid saturation and protein burden effects (39). The width of each interval  
371 gate should be about 20-30% of the value of its lower border.

372 5) If the gating intervals are not directly applied at acquisition time on the flow cytometer, at  
373 least  $10^6$  cells should be acquired for analysis. This number is sufficient to reach a converged  
374 ladder after gating (see Suppl. Fig. S4). For this number of cells cultures of 10ml are  
375 sufficient.

376

### 377 *Conclusion*

378 The newly constructed vectors provide access to a novel quantitative Y2H system with  
379 fluorescent tags for the reaction partners (BD-Bait, AD-Prey) and the reporter. The established  
380 protocol is rapid, sensitive and highly reproducible. It permits easy detection of expression  
381 problems of the reaction partners. Using flow cytometry, the expression levels of the reaction  
382 partners can be monitored cell by cell simultaneously with the level of the reporter. The single-cell  
383 data can be exploited to identify correlation patterns as indicators of physical interactions.

384 The qY2H method presented in this work offers also an approach to quantitative data on  
385 the strength of protein-protein interactions in living cells. In this context, we have demonstrated  
386 the importance of quantifying the product and the reaction partners of the Y2H reaction:  
387 standardization is critical to correct for differences in expression levels between couples. Using a

## A quantitative tri-fluorescent yeast two-hybrid system

388 straightforward gating analysis, an affinity ladder can be easily generated that permits rapid  
389 classification of PPIs according to their affinity. We would like to emphasize, however, that these  
390 *in-cellula* affinities are effective quantities that depend on the cell's complex microenvironment;  
391 and this environment may change as a function of the yeast strain and the experimental conditions  
392 (temperature, medium, *etc*).

393 All steps of the protocol have been optimized in liquid phase that can be easily automated  
394 for the use of microplates and integrated within robotic pipelines. It sets the stage for high-  
395 throughput quantitative Y2H screenings of PPIs using cross-mating approaches (40, 41) with  
396 libraries of yeast clones. As an outlook, quantitative PPI networks can be created by attributing  
397 weights to the PPI edges according to their *in-cellula* reporter levels. It contrasts standard Y2H  
398 screens that yield networks with only binary information (YES or NO). The topology of force-  
399 directed networks may help identifying key pathways within the network, and how these paths  
400 change as a function of environmental conditions (stress, metabolism, *etc*). Thus, we anticipate that  
401 high-throughput qY2H data would boost the modelling of interactomes and thereby advance  
402 significantly systems biology.

403

404

405

406 **Acknowledgements**

407           This project was supported by a grant from the Fond Recherche of the ENS de Lyon. We  
408 are grateful to the Pôle Scientifique de Modélisation Numérique (Lyon, France) for computer time,  
409 and the SFR Biosciences Gerland-Lyon Sud (UMS344/US8) for the access to the MacsQuantVYB  
410 flow cytometer. We thank Dr Francesca Palladino and Matthieu Caron for technical support on the  
411 Western blots and Dr Gaël Yvert for helpful comment on the manuscript.

412

413

414 **Data Availability**

415 Our python scripts (with a graphical user interface and user guide for the automated  
416 generation of the qY2H affinity ladder) can be downloaded here: [http://github.com/LBMC/qY2H-](http://github.com/LBMC/qY2H-Affinity-Ladder)  
417 [Affinity-Ladder](http://github.com/LBMC/qY2H-Affinity-Ladder).

418 The flow cytometry files of the experiment shown in Fig. 4 can be downloaded from  
419 <http://flowrepository.org> under accession number FR-FCM-ZYUL. Other experimental data can  
420 be provided upon request.

421

422 **References**

- 423 1. Vogelstein B, Lane D, Levine AJ (2000) Surfing the p53 network. *Nature* 408(6810):307–  
424 310.
- 425 2. Feng Y, Walsh CA (2001) Protein–Protein interactions, cytoskeletal regulation and neuronal  
426 migration. *Nat Rev Neurosci* 2(6):408–416.
- 427 3. Takenawa T, Suetsugu S (2007) The WASP–WAVE protein network: connecting the  
428 membrane to the cytoskeleton. *Nat Rev Mol Cell Biol* 8(1):37–48.
- 429 4. Scott JD, Pawson T (2009) Cell Signaling in Space and Time: Where Proteins Come Together  
430 and When They’re Apart. *Science* 326(5957):1220–1224.
- 431 5. Barabási A-L, Oltvai ZN (2004) Network biology: understanding the cell’s functional  
432 organization. *Nat Rev Genet* 5(2):101–113.
- 433 6. Fields S, Song O (1989) A novel genetic system to detect protein–protein interactions. *Nature*  
434 340(6230):245.
- 435 7. Gyuris J, Golemis E, Chertkov H, Brent R (1993) Cdi1, a human G1 and S phase protein  
436 phosphatase that associates with Cdk2. *Cell* 75(4):791–803.
- 437 8. Stynen B, Tournu H, Tavernier J, Van Dijck P (2012) Diversity in Genetic In Vivo Methods  
438 for Protein-Protein Interaction Studies: from the Yeast Two-Hybrid System to the  
439 Mammalian Split-Luciferase System. *Microbiol Mol Biol Rev* 76(2):331–382.
- 440 9. Parrish JR, Gulyas KD, Finley RL (2006) Yeast two-hybrid contributions to interactome  
441 mapping. *Curr Opin Biotechnol* 17(4):387–393.

- 442 10. Vidal M, Fields S (2014) The yeast two-hybrid assay: still finding connections after 25 years.  
443 *Nat Methods* 11(12):1203–1206.
- 444 11. Estojak J, Brent R, Golemis EA (1995) Correlation of two-hybrid affinity data with in vitro  
445 measurements. *Mol Cell Biol* 15(10):5820–5829.
- 446 12. Fields S (1993) The Two-Hybrid System to Detect Protein-Protein Interactions. *Methods*  
447 5(2):116–124.
- 448 13. Möckli N, Auerbach D (2004) Quantitative  $\beta$ -galactosidase assay suitable for high-throughput  
449 applications in the yeast two- hybrid system. *BioTechniques* 36(5):5.
- 450 14. Wagemans J, Lavigne R (2015) Identification of Protein-Protein Interactions by Standard  
451 Gal4p-Based Yeast Two-Hybrid Screening. *Protein-Protein Interactions*, eds Meyerkord CL,  
452 Fu H (Springer New York, New York, NY), pp 409–431.
- 453 15. Estojak J, Brent R, Golemis EA (1995) Correlation of two-hybrid affinity data with in vitro  
454 measurements. *Mol Cell Biol* 15(10):5820–5829.
- 455 16. Colas P, Cohen B, Ferrigno PK, Silver PA, Brent R (2000) Targeted modification and  
456 transportation of cellular proteins. *Proc Natl Acad Sci* 97(25):13720–13725.
- 457 17. Hu X, Kang S, Chen X, Shoemaker CB, Jin MM (2009) Yeast Surface Two-hybrid for  
458 Quantitative *in Vivo* Detection of Protein-Protein Interactions via the Secretory Pathway. *J*  
459 *Biol Chem* 284(24):16369–16376.
- 460 18. Zolghadr K, et al. (2008) A fluorescent two-hybrid assay for direct visualization of protein  
461 interactions in living cells. *Mol Cell Proteomics MCP* 7(11):2279–2287.

- 462 19. Yurlova L, et al. (2014) The Fluorescent Two-Hybrid Assay to Screen for Protein–Protein  
463 Interaction Inhibitors in Live Cells: Targeting the Interaction of p53 with Mdm2 and Mdm4.  
464 *J Biomol Screen* 19(4):516–525.
- 465 20. Jeong KJ, Seo MJ, Iverson BL, Georgiou G (2007) APEX 2-hybrid, a quantitative protein-  
466 protein interaction assay for antibody discovery and engineering. *Proc Natl Acad Sci*  
467 104(20):8247–8252.
- 468 21. Dutta S, Koide A, Koide S (2008) High-throughput Analysis of the Protein Sequence–  
469 Stability Landscape using a Quantitative Yeast Surface Two-hybrid System and Fragment  
470 Reconstitution. *J Mol Biol* 382(3):721–733.
- 471 22. Golemis EA, et al. (2000) Interaction Trap/Two-Hybrid System to Identify Interacting  
472 Proteins. *Curr Protoc Cell Biol* 8(1):17.3.1-17.3.42.
- 473 23. Schreiber G, Fersht AR (1995) Energetics of protein-protein interactions: Analysis of the  
474 Barnase-Barstar interface by single mutations and double mutant cycles. *J Mol Biol*  
475 248(2):478–486.
- 476 24. Frisch C, Schreiber G, Johnson CM, Fersht AR (1997) Thermodynamics of the interaction of  
477 barnase and barstar: changes in free energy versus changes in enthalpy on mutation 1 | Edited  
478 by J. Karn. *J Mol Biol* 267(3):696–706.
- 479 25. Herrmann C, Horn G, Spaargaren M, Wittinghofer A (1996) Differential Interaction of the  
480 Ras Family GTP-binding Proteins H-Ras, Rap1A, and R-Ras with the Putative Effector  
481 Molecules Raf Kinase and Ral-Guanine Nucleotide Exchange Factor. *J Biol Chem*  
482 271(12):6794–6800.



- 483 26. Block C, Janknecht R, Herrmann C, Nassar N, Wittinghofer A (1996) Quantitative structure-  
484 activity analysis correlating Ras/Raf interaction in vitro to Raf activation in vivo. *Nat Struct*  
485 *Mol Biol* 3(3):244–251.
- 486 27. Fischer A, et al. (2007) B- and C-RAF Display Essential Differences in Their Binding to Ras:  
487 *THE ISOTYPE-SPECIFIC N TERMINUS OF B-RAF FACILITATES RAS BINDING. J Biol*  
488 *Chem* 282(36):26503–26516.
- 489 28. Kiel C (2003) Untersuchung von Ras/Effektor-Komplexen mit gezielt veränderten  
490 elektrostatischen Eigenschaftens. PhD Thesis (Dissertation, Ruhr-Universität Bochum,  
491 Fachbereich Biochemie).
- 492 29. Kiel C, et al. (2009) Improved Binding of Raf to Ras-GDP Is Correlated with Biological  
493 Activity. *J Biol Chem* 284(46):31893–31902.
- 494 30. Ma H, Kunes S, Schatz PJ, Botstein D (1987) Plasmid construction by homologous  
495 recombination in yeast. *Gene* 58(2):201–216.
- 496 31. Kevin R O, Vo KT, Michaelis S, Paddon C (1997) Recombination-mediated PCR-directed  
497 plasmid construction in vivo in yeast. *Nucleic Acids Res* 25(2):451–452.
- 498 32. Foiani M, Marini F, Gamba D, Lucchini G, Plevani P (1994) The B subunit of the DNA  
499 polymerase alpha-primase complex in *Saccharomyces cerevisiae* executes an essential  
500 function at the initial stage of DNA replication. *Mol Cell Biol* 14(2):923.
- 501 33. Gietz RD, Schiestl RH (2007) Frozen competent yeast cells that can be transformed with high  
502 efficiency using the LiAc/SS carrier DNA/PEG method. *Nat Protoc* 2(1):1.

- 503 34. Bagwell CB (2005) Hyperlog-A flexible log-like transform for negative, zero, and positive  
504 valued data. *Cytometry A* 64A(1):34–42.
- 505 35. Golemis EA, Brent R (1992) Fused protein domains inhibit DNA binding by LexA. *Mol Cell*  
506 *Biol* 12(7):3006–3014.
- 507 36. Bickle MBT, Dusserre E, Moncorgé O, Bottin H, Colas P (2006) Selection and  
508 characterization of large collections of peptide aptamers through optimized yeast two-hybrid  
509 procedures. *Nat Protoc* 1(3):1066–1091.
- 510 37. Bustamante C, Liphardt J, Ritort F (2005) The Nonequilibrium Thermodynamics of Small  
511 Systems. *Phys Today* 58(7):43–48.
- 512 38. Hancock JF, Paterson H, Marshall CJ (1990) A polybasic domain or palmitoylation is  
513 required in addition to the CAAX motif to localize p21ras to the plasma membrane. *Cell*  
514 63(1):133–139.
- 515 39. Bolognesi B, Lehner B (2018) Reaching the limit. *eLife* 7. doi:10.7554/eLife.39804.
- 516 40. Kolonin MG, Zhong J, Finley RL (2000) [3] Interaction mating methods in two-hybrid  
517 systems. *Applications of Chimeric Genes and Hybrid Proteins - Part C: Protein-Protein*  
518 *Interactions and Genomics*, Methods in Enzymology., eds Methods in Enzymology. Thorner  
519 J, Emr SD, Abelson JN (Academic Press), pp 26–46.
- 520 41. Chen J, Carter MB, Edwards BS, Cai H, Sklar LA (2012) High throughput flow cytometry  
521 based yeast two-hybrid array approach for large-scale analysis of protein-protein interactions.  
522 *Cytometry A* 81A(1):90–98.

523 **Tables**

524 **Table 1: List of BD-Bait and AD-Prey couples tested with the qY2H approach.**

525 The dissociation constants ( $K_d$ ) were taken from the referenced literature and are given in pM;  
 526 the molecular weights (MW) are in kDa. CENTER DONE

| Bait proteins                |                 |         |            |    | Prey proteins        |                              |        |          |        |    |
|------------------------------|-----------------|---------|------------|----|----------------------|------------------------------|--------|----------|--------|----|
| Organism                     | Family          | Name    | Mutant     | MW | $K_d$                | Organism                     | Family | Name     | Mutant | MW |
| <i>B. amylo-liquefaciens</i> | RNAse inhibitor | Barstar | Y29A       | 10 | 420 <sup>a</sup>     | <i>B. amylo-liquefaciens</i> | RNAse  | Barnase  | H102A  | 12 |
|                              |                 |         | Y29F       | 10 | 117 <sup>a</sup>     |                              |        |          |        |    |
|                              |                 |         | W38F       | 10 | 4 000 <sup>a</sup>   |                              |        |          |        |    |
|                              |                 |         | D39A       | 10 | 420 000 <sup>b</sup> |                              |        |          |        |    |
| <i>H. sapiens</i>            | GTPase          | HRas    | G12V A186C | 21 | 122 000 <sup>c</sup> | <i>H. sapiens</i>            | Kinase | CRaf RBD | WT     | 9  |
|                              |                 |         |            |    | 11 000 <sup>d</sup>  |                              |        |          | A85K   | 9  |

527

528 <sup>a</sup> ITC, 50mM Tris/HCl, pH 8 at 25°C (23).

529 <sup>b</sup> Mean values from two studies (23, 24) with ITC, 24mM Hepes, pH 8, 1 mM DTT at 25°C.

530 <sup>c</sup> Mean values from four studies of Ras G12V (without the membrane anchor): SPR, 50 mM Tris/HCl, pH 7.4, 100mM  
 531 NaCl, 5 mM MgCl<sub>2</sub> (25); SPR, 50 mM Tris/HCl, pH 7.4, 100mM NaCl, 5 mM MgCl<sub>2</sub> (26); SPR, 10 mM Hepes, pH  
 532 7.4, 150 mM NaCl, 2 mM MgCl<sub>2</sub>, and 0.01% Nonidet P-40 25°C (27); ITC, 50 mM Hepes, pH 7.4, 125 mM NaCl,  
 533 5 mM MgCl<sub>2</sub>, 25°C (29).

534 <sup>d</sup> ITC, 50 mM Hepes, pH 7.4, 125 mM NaCl, 5 mM MgCl<sub>2</sub>, 25°C (29). The dissociation constant of the CRaf RBD  
 535 A85K mutant was measured with HRas WT loaded with a GTP-analogue. The mutant HRas G12V is known to  
 536 decrease the dissociation constant for the interaction with CRaf RBD WT by a factor of 11 (28). The given value  
 537 applies the same correction factor.

538

539

## A quantitative tri-fluorescent yeast two-hybrid system

### 540 Figures

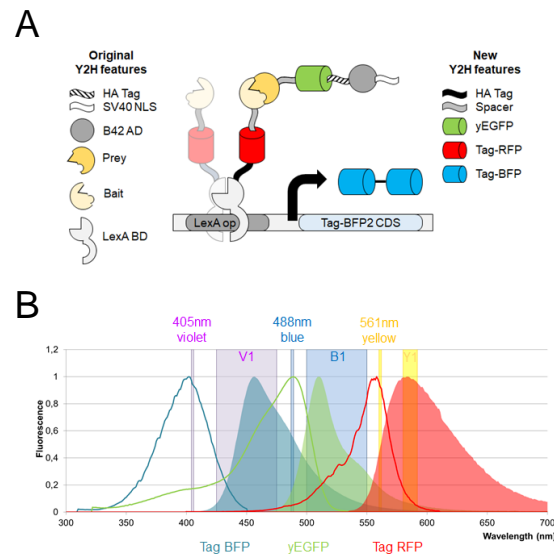

### 541 Fig. 1.

542 **Concept of the qY2H approach.** A. Our novel Y2H system is based on the one of Brent and  
543 coworkers (22). It relies on a split transcription factor where the Bait protein is fused to the LexA  
544 DNA-binding domain (BD). The latter binds specifically to the operator of the reporter cassette.  
545 The Prey protein is fused to the B42 activation domain (AD). The interaction between BD-Bait and  
546 AD-Prey reconstitutes a functional transcription factor that drives the expression of the reporter  
547 gene. Our quantitative Y2H approach monitors as a novelty the expression levels of BD-Bait, AD-  
548 Prey and the reporter at the single cell level using fluorescent tags. The original fusion proteins  
549 when expressed with the constructs of Brent and coworkers are described in the left column of the  
550 legend. Our newly added features are presented in the right column. The spacer amino-acid  
551 sequence is EFGRALE. B. The three fluorescent proteins have separated excitation (bold lines)  
552 and emission (areas) spectra. Thus, their expression can be easily monitored using compatible flow  
553 cytometers. In this work we used a MacsQuant VYB flow cytometer. The three lasers (Violet, Blue,  
554 and Yellow) and their respective detection channels (V1, B1, and Y1) are represented as vertical  
555 bands.

## A quantitative tri-fluorescent yeast two-hybrid system

556

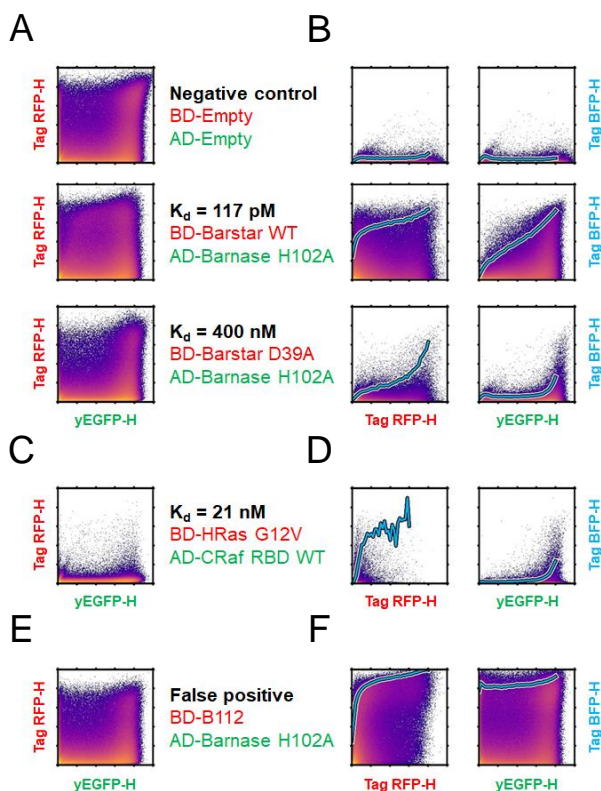

557 **Fig. 2.**

558 **Single-cell raw data from the flow-cytometry acquisition.** *A-F*. Fluorescence intensities in the  
559 channels corresponding to the BD-Bait (Tag-RFP-H), AD-Prey (yEGFP-H) and reporter (Tag-  
560 BFP-H) are represented as density-colored scatter plots for a subset of studied couples. Intensities  
561 were pre-processed by a hlog-transformation. The expression of the BD-Bait as a function of AD-  
562 Prey is presented in *A*, *C* and *E*. The expression level of the reporter as function of the BD-Bait or  
563 AD-Prey is displayed in *B*, *D* and *F*. The cyan bold line represents the evolution of the Tag-BFP-  
564 H intensity when averaged over the 5% top-ranked cells in slices of the yEGFP-H or Tag-RFP-H  
565 channel. Our system was validated using a negative control, a strong (picomolar) and a medium  
566 (nanomolar) couple, see *A* and *B*. As an example for low expression, the construct BD-Bait HRas  
567 is shown in *C* and *D*. We also constructed a genetic fusion of the LexA BD with the B112 AD as  
568 an example of a false positive interaction, see *E* and *F*.

## A quantitative tri-fluorescent yeast two-hybrid system

569

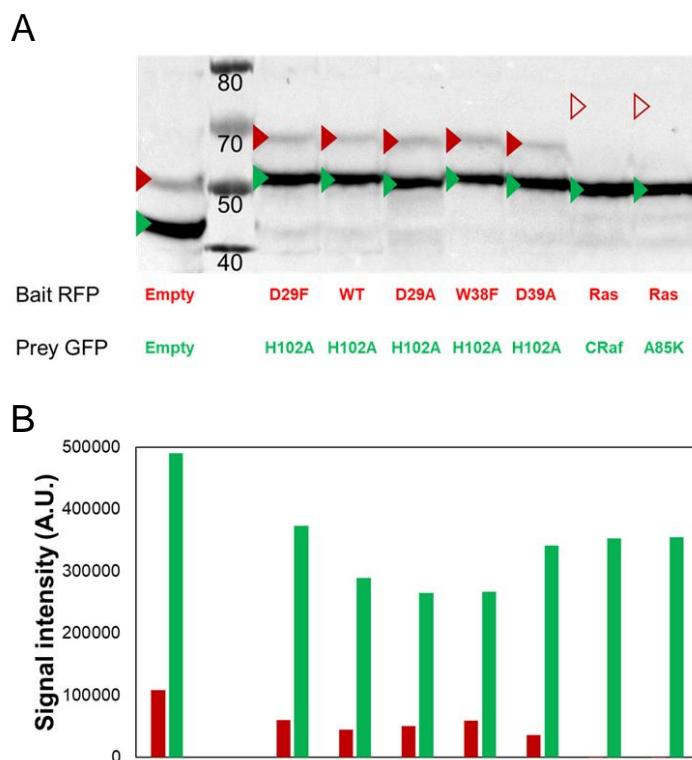

570

571 **Fig. 3.**

572 **Simultaneous detection of BD-Baits and AD-Preys by western blotting using a single primary**

573 **antibody.** A. The various studied couples were submitted to western blot analysis. Total proteins

574 were extracted from 6 OD of diploid yeasts grown for 2h at 30°C in SGR –UHW (0.25% galactose).

575 The BD-Bait and AD-Prey fusion proteins were simultaneously detected by Western blotting using

576 HA tag (originally present only in the AD-Prey proteins, and newly added to the BD-Bait proteins).

577 The expected molecular weights of the fusion proteins are indicated by red (BD-Bait) or green

578 (BD-Prey) triangles. Except for Ras G12V C186A (empty red triangles), all the proteins are

579 detectable at their correct molecular weight. B. The differential expression level was then

580 quantified using ImageJ program. A four to nine fold overexpression of the AD-Prey compared to

581 the corresponding BD-Bait (when detectable) can be observed.

## A quantitative tri-fluorescent yeast two-hybrid system

582

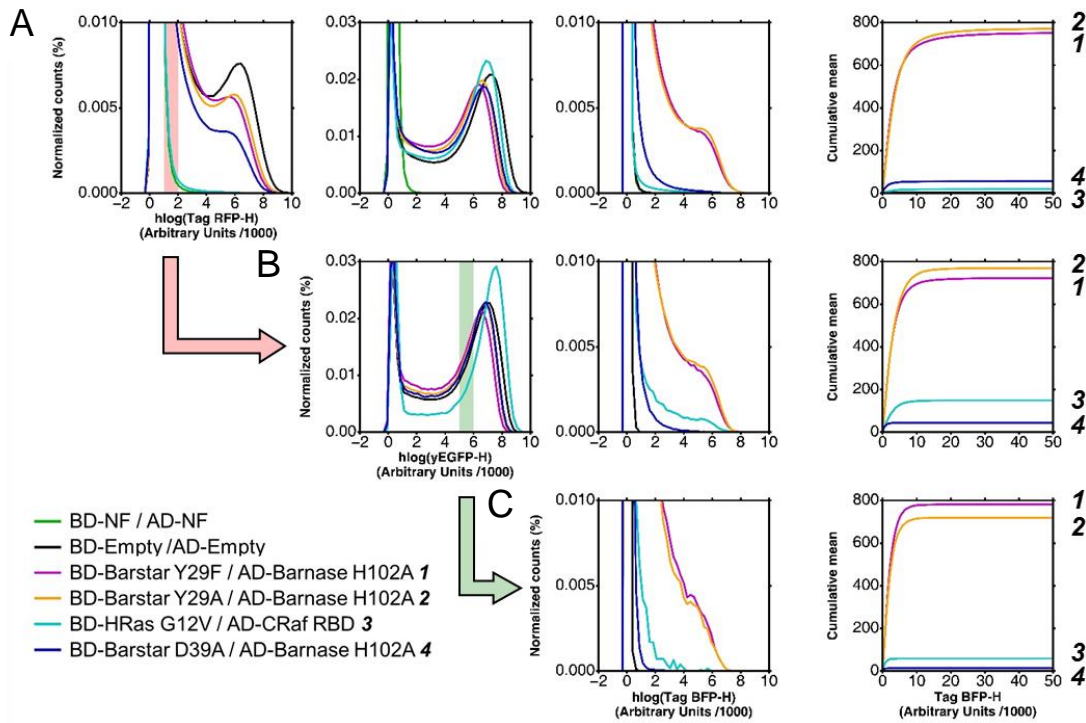

583

584 **Fig. 4.**

585 **Influence of the expression level of BD-Bait and AD-Prey on the read-out.** A-C. The expression  
 586 levels of BD-Bait (1<sup>st</sup> column), AD-Prey (2<sup>nd</sup>) and reporter (3<sup>rd</sup>) are visualized as distribution of  
 587 the hlog-transformed fluorescence intensities. In order to better visualize differences in the reporter  
 588 expression we use an additional representation of the cumulative mean in linear scale (4<sup>th</sup> column).  
 589 The distributions and cumulative mean are shown for the global population in A and gated  
 590 subpopulations in B and C. For reasons of clarity only an illustrative subset of studied couples is  
 591 shown. In the legend these couples are ordered and numbered (1-4) according to their *in-vitro*  
 592 affinity. The order of the couples according to the reporter expression (*i.e.*, mean value of the Tag-  
 593 BFP-H channel) is given on the very right side of the three subfigures. The global population of  
 594 cells reveals significant differences in the expression levels of BD-Bait and to a smaller extent of

## A quantitative tri-fluorescent yeast two-hybrid system

595 AD-Prey *A*. Due to these expression level differences, the mean values of Tag-BFP-H are ordered  
596 differently than the *in-vitro* affinities: **2** displays a stronger reporter expression than **1**, and **4**  
597 stronger than **3**. Only the discrimination between strong (**1**, **2**) and medium (**3**, **4**) interactors is  
598 possible. The successive gating of cells, first based on Tag-RFP-H values (*B*), and then based on  
599 yEGFP-H values (*C*), allows to equalize the expression levels. Such standardized subpopulations  
600 improve the extraction of quantitative information on the strength of the Bait-Prey interactions: the  
601 Tag-BFP-H mean value is ordered according to the *in vitro* affinities. The transparent red bar in  
602 the panel of the 1<sup>st</sup> column shows the Tag-RFP-H gating interval applied to obtain the  
603 subpopulation in *B* (symbolized by the red action arrow). Similarly, the green bar and arrow  
604 illustrate the yEGFP-H gating interval applied to the subpopulation in *B* to obtain the final  
605 subpopulation in *C*.



606

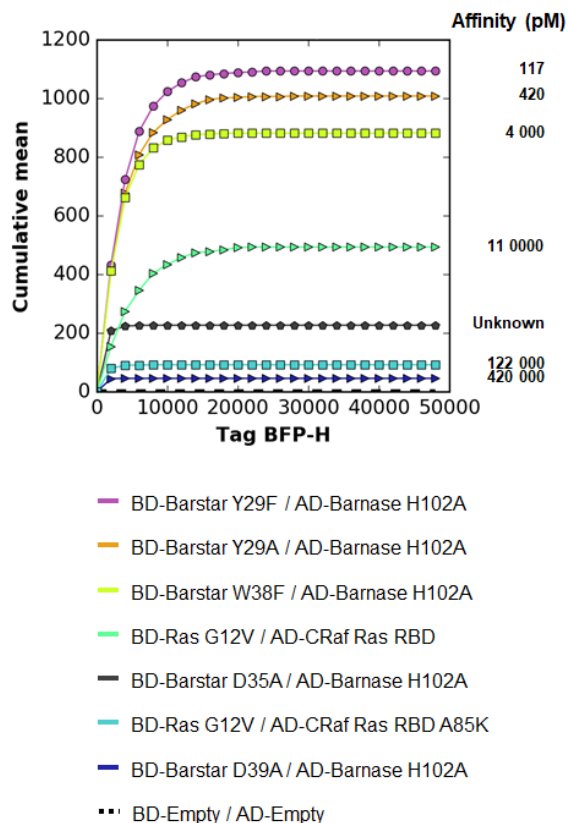

**Fig. 5.**

**qY2H affinity ladder.** The same dual gating approach as in Fig. 4 was applied to all studied couples of Table 1. Here one representative experiment is presented. The cumulative mean of the negative control (BD-Empty / AD-Empty) was removed in all cases. The resulting cumulative mean curves are ordered according to their reporter dissociation constants (Table 1). For the couple BD-Barstar D35A / AD-Barnase H102A no dissociation constant is reported in the literature. Our affinity ladder allows to rank the constant between 11 and 122 nM.

607
